# Supplementary material for: miRNAs-mediated overexpression of Periostin is correlated with poor prognosis and immune infiltration in lung squamous cell carcinoma
Source: publisher site journal article supplement (doi:10.18632/aging.204056), 2022-05-04
Supplement: Supplementary file [file aging-v14i9-204056-supplementary-material-SD1.pdf]

# SUPPLEMENTARY FIGURES

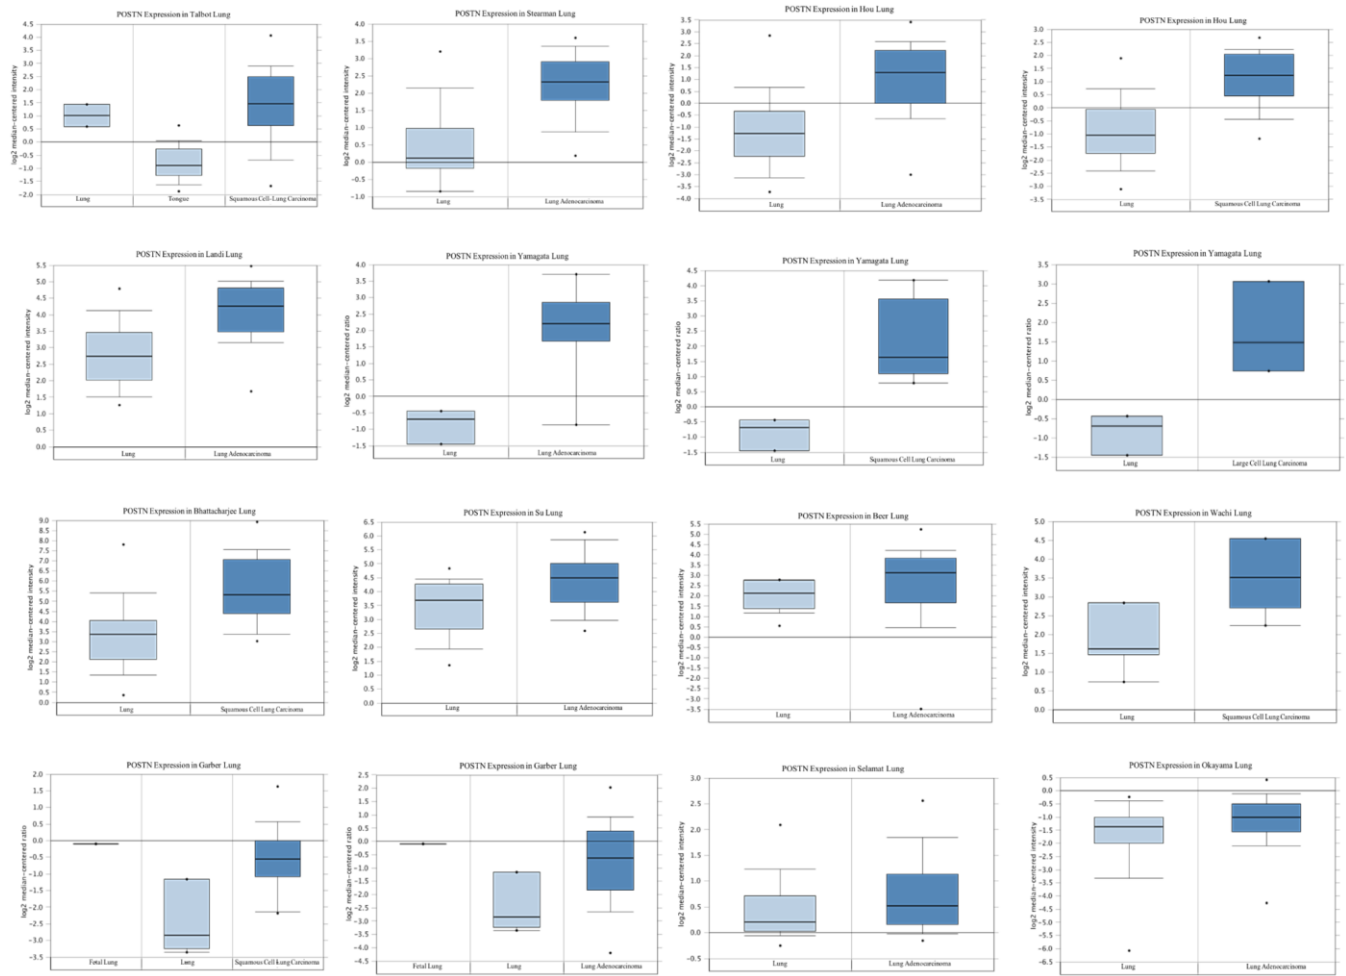

Supplementary Figure 1. POSTN expression in different types of lung cancer patients and normal individuals from the Oncomine database.

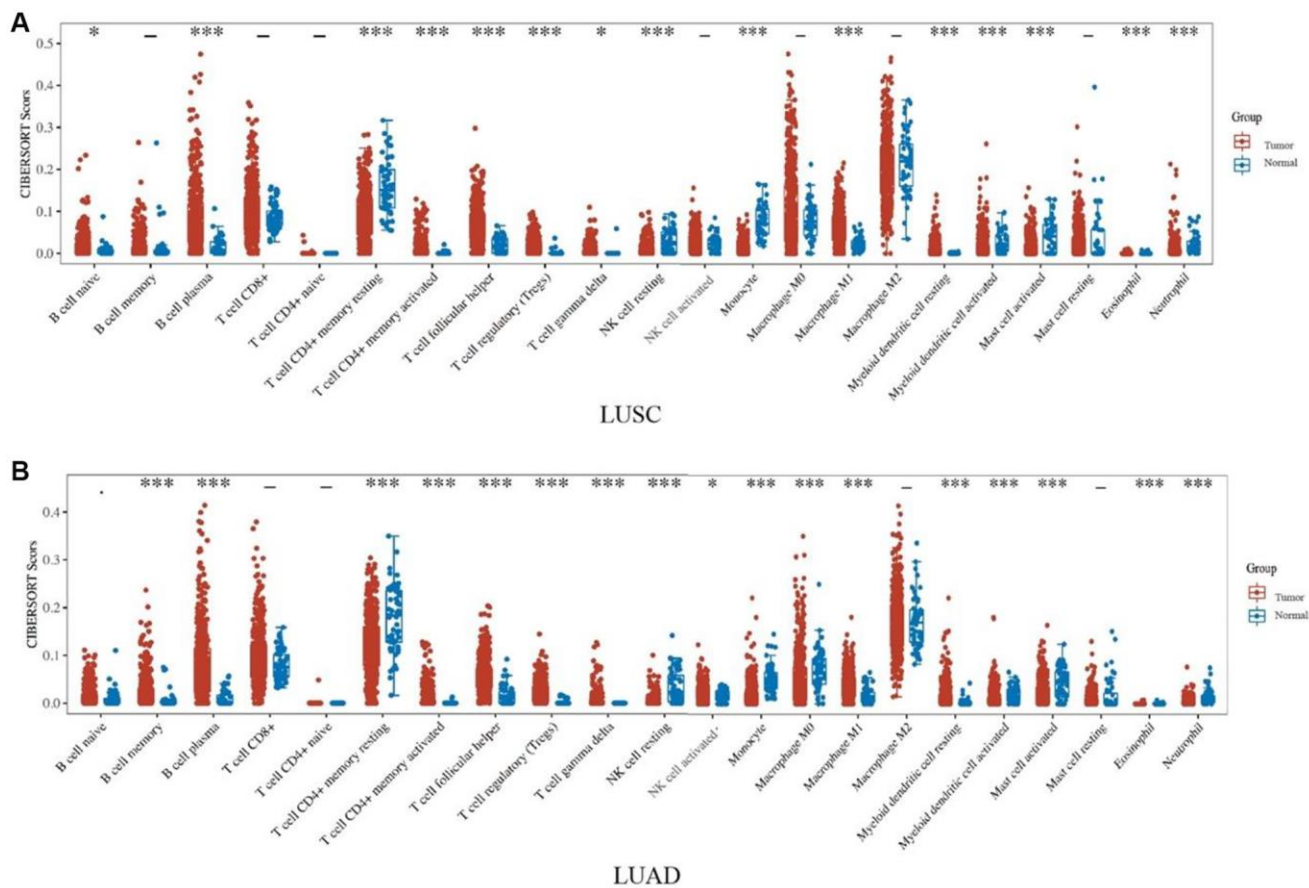

**Supplementary Figure 2. Immune cell infiltration differs between tumor and normal tissues.** The differences of POSTN expression in immune cell subsets in LUSC and normal groups (A). The differences of POSTN expression in immune cell subsets in LUSC and normal groups (B). \* $p < 0.05$ , \*\* $p < 0.01$ , \*\*\* $p < 0.001$ .

**A**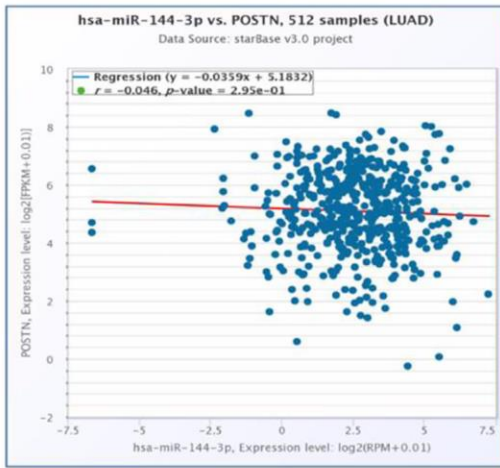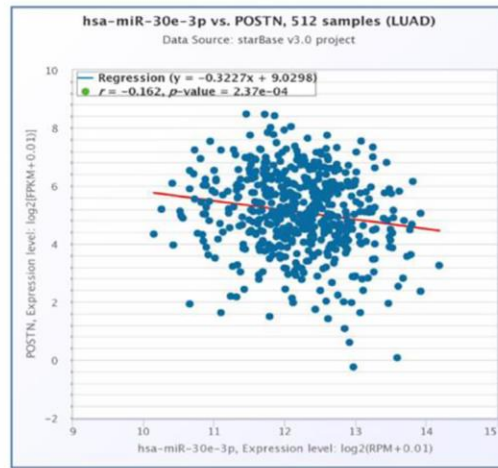**B**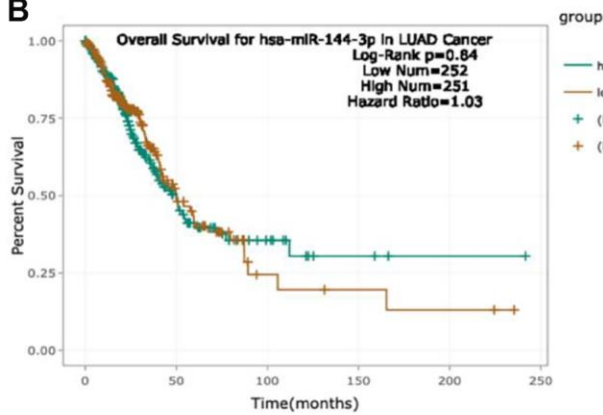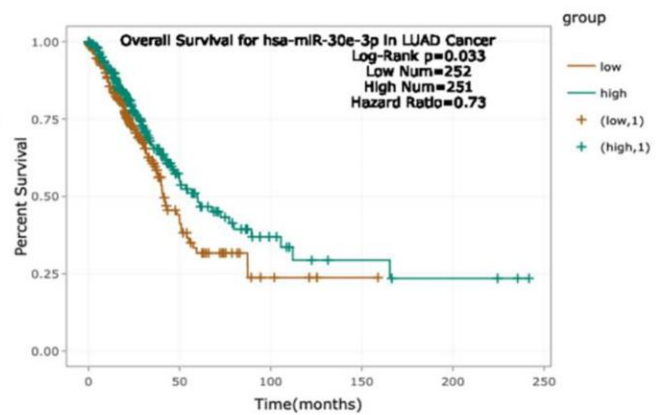**C**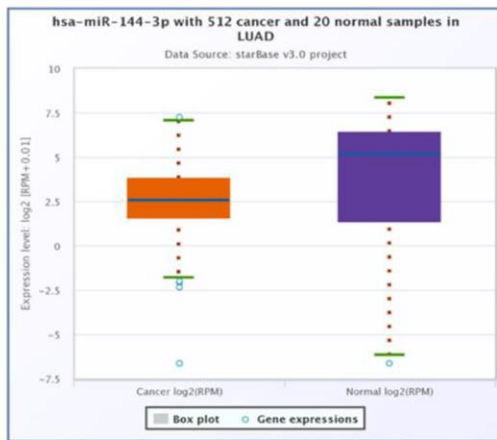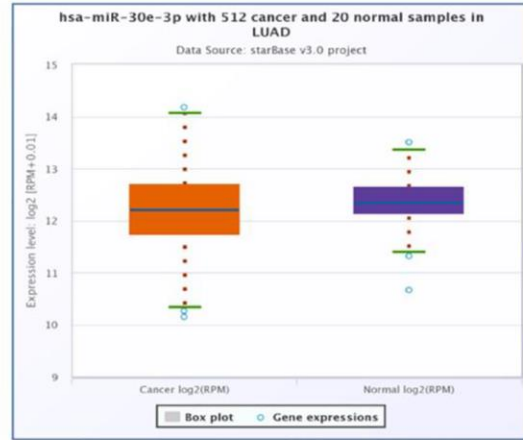

**Supplementary Figure 3. Diagnostic value of POSTN in LUAD.** The correlation between the expression of POSTN and POSTN-targeted miRNAs in LUAD and control normal samples determined by the starBase database (A). The prognostic value of POSTN-targeted miRNAs in LUAD assessed by Kaplan-Meier plotter (B). The expression of POSTN-targeted miRNAs in LUAD and control normal samples determined by starBase database (C).
